# Supplementary material for: Age-associated changes in the immune system may influence the response to anti-PD1 therapy in metastatic melanoma patients
Source: Springer Nature journal article supplement (doi:10.1007/s00262-020-02497-9), 2020-02-08
Supplement: MOESM1 [file 17662184]

# Nivolumab

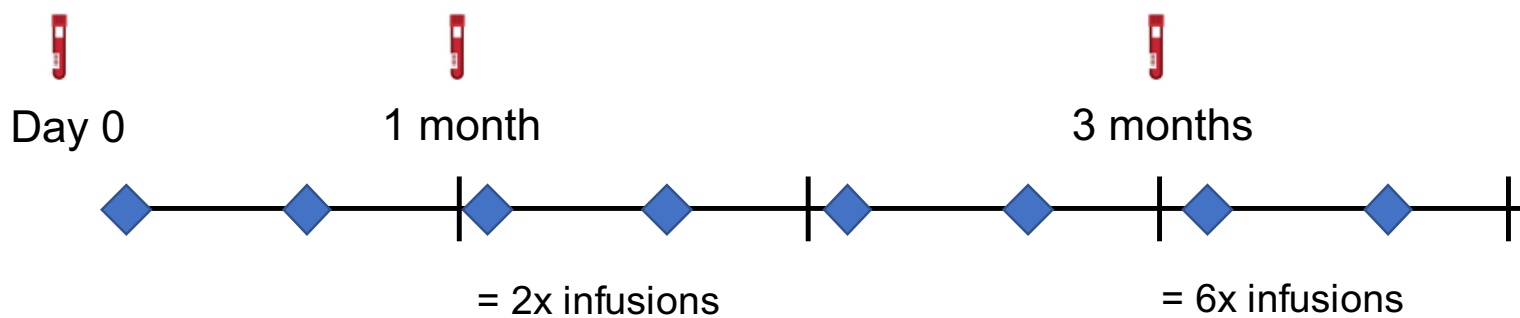

# Pembrolizumab

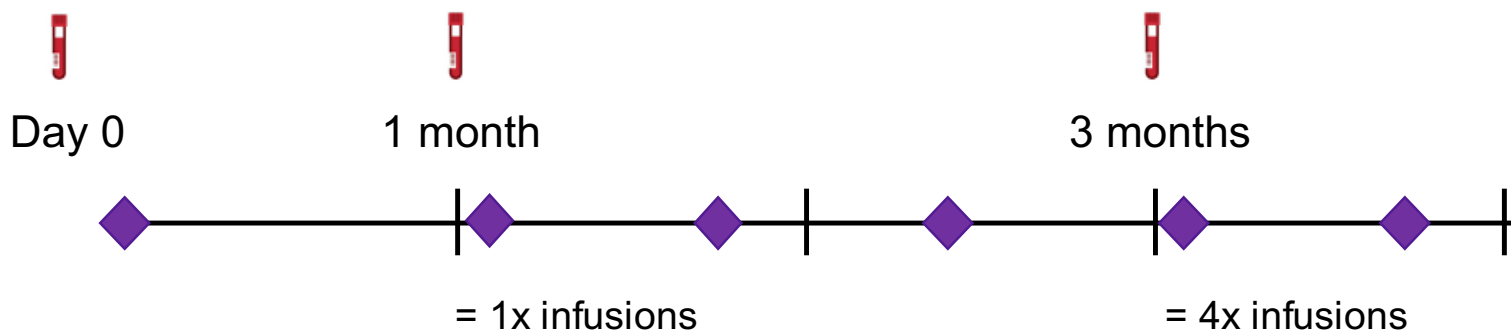

**Supplemental Figure 1.** Blood sampling and drug infusion schedule.

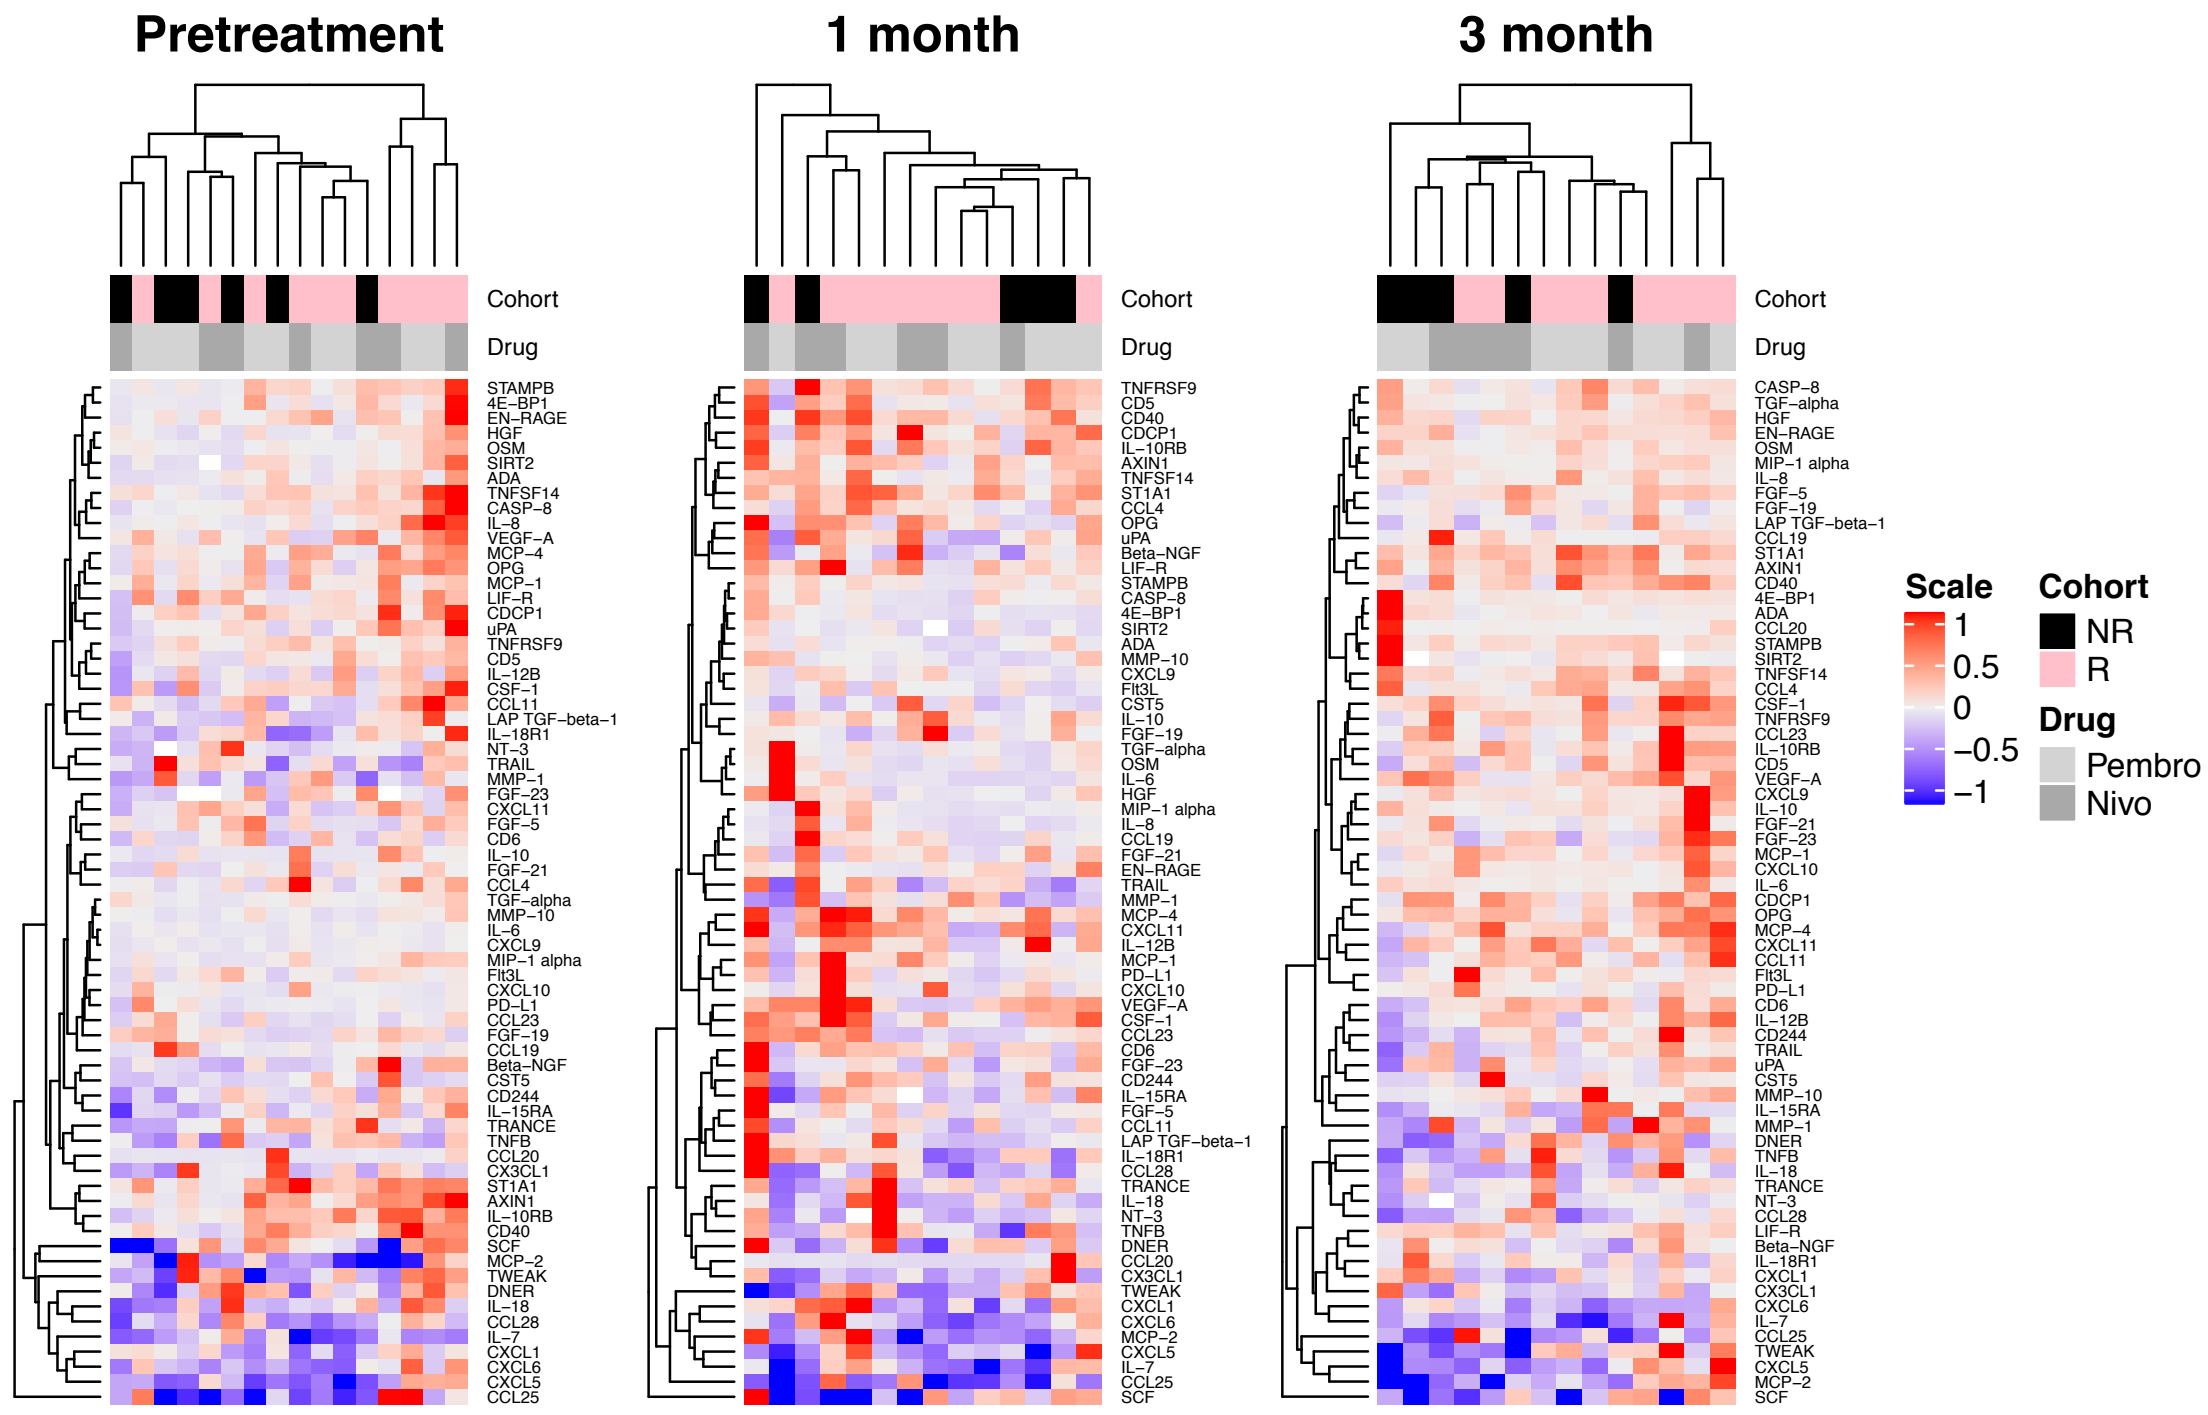

**Supplemental Figure 2.** Serum cytokine profile before and after 1 and 3 months of anti-PD1 therapy. Cohort: NR = non-responder, R = responder.

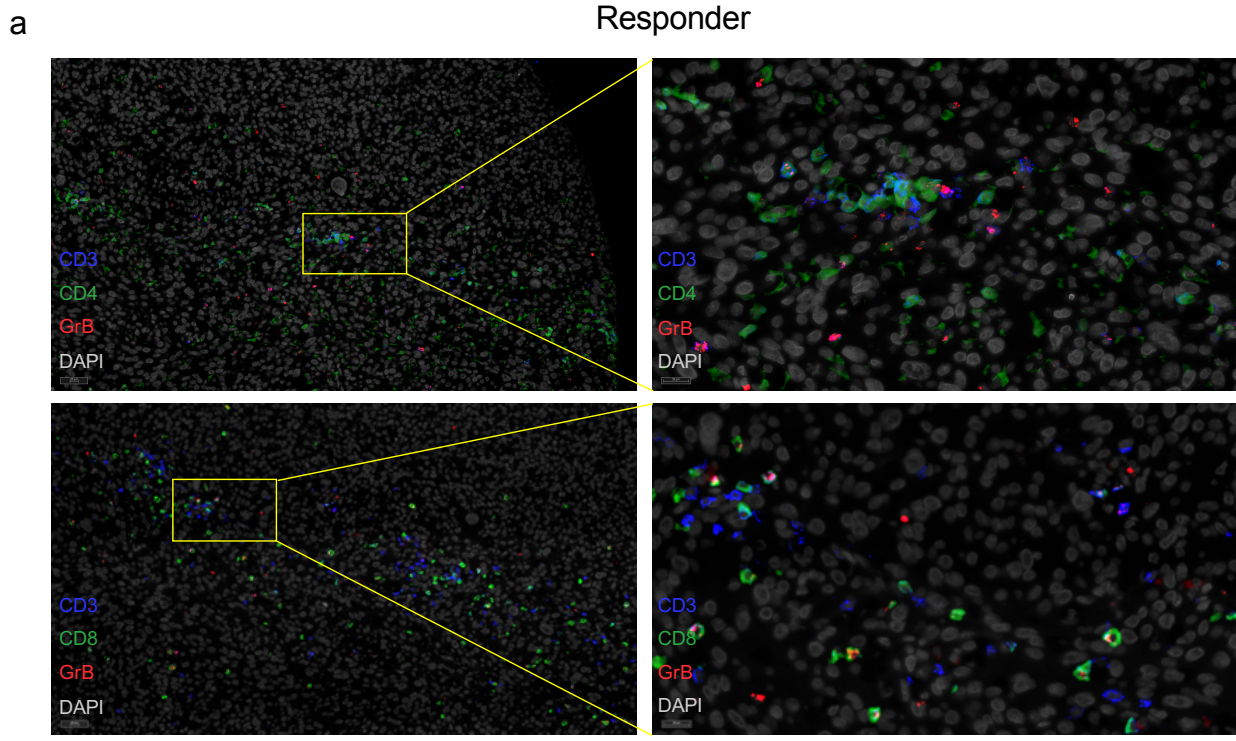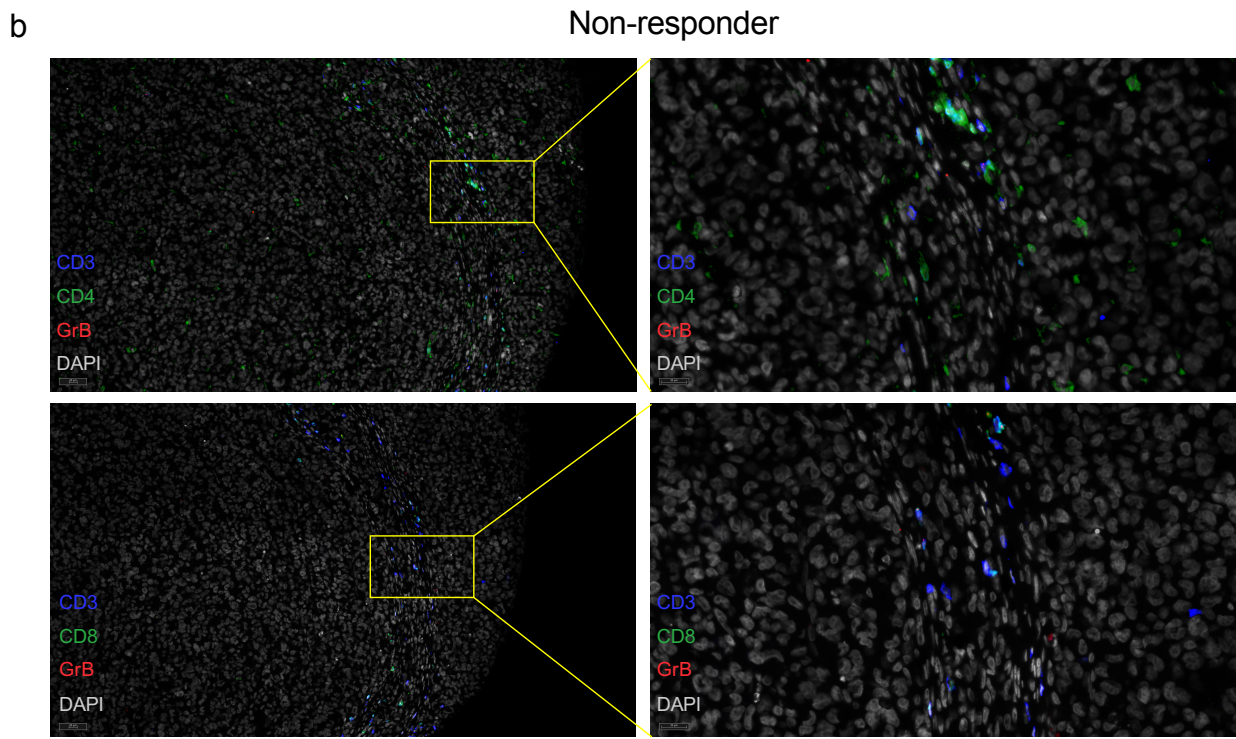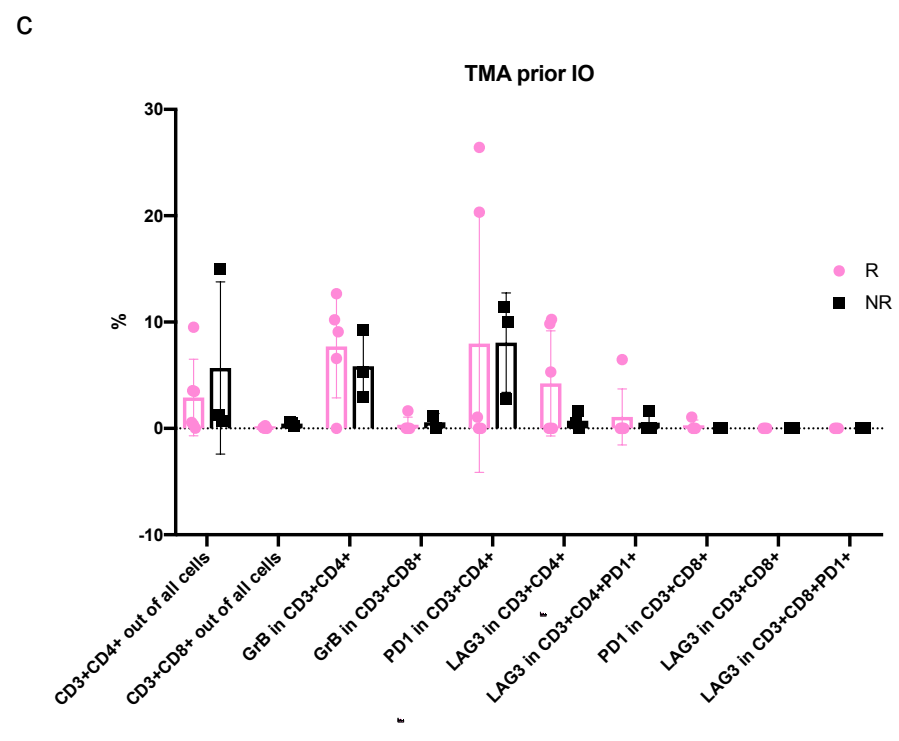

**Supplemental Figure 3.** Multiplexed immunohistochemistry of intratumoral lymphocytes from FFPE metastatic melanoma biopsies at the time of diagnosis. a) Representative case of the TILs from anti-PD1 responder tumor. b) Representative case of the TILs from anti-PD1 non-responder tumor. c) Levels of the TIL subpopulations from all studied biopsies.

| <b>Antibody</b>     | <b>Fluorochrome</b> | <b>Catalog no</b> | <b>Manufacturer</b> |
|---------------------|---------------------|-------------------|---------------------|
| CD16                | PE                  | 561313            | BD                  |
| CD3                 | PerCP-Cy5.5         | 332771            | BD                  |
| CD4                 | PE-Cy7              | 560649            | BD                  |
| GammaDelta          | APC                 | 555718            | BD                  |
| CD45                | APC-H7              | 560178            | BD                  |
| CD8                 | BV510               | 563919            | BD                  |
| CD56                | BV421               | 562751            | BD                  |
| PD1 (clone: MIH4)   | FITC                | 557860            | BD                  |
| PD1 (clone: EH12.1) | BB515               | 564494            | BD                  |
| LAG-3               | PE                  | 12-2239-42        | eBioscience         |
| ICOS                | PE-Cy7              | 25-9948-41        | eBioscience         |
| CTLA4               | APC                 | 560938            | BD                  |
| HLA-DR              | BB515               | 564516            | BD                  |
| CD27                | PE                  | 555441            | BD                  |
| CD25                | PE-Cy7              | 561405            | BD                  |
| CD11b               | APC                 | 550019            | BD                  |
| NKG2C               | AF488               | FAB138G           | RnD                 |
| CD161               | PE                  | 556081            | BD                  |
| NKG2D               | PE-Cy7              | 562365            | BD                  |
| NKG2A               | APC                 | FAB1059A          | RnD                 |
| 3DL1 (CD158e)       | FITC                | 130-099-387       | Miltenyi Biotec     |
| 2DS4 (CD158i)       | PE-Vio770           | 130-099-963       | Miltenyi Biotec     |
| CD3                 | VioGreen            | 130-098-164       | Miltenyi Biotec     |
| 2DL2/S2/L3 (CD158b) | PE                  | 130-099-397       | Miltenyi Biotec     |
| 2DL1/S1 (CD158a/h)  | APC                 | 130-099-715       | Miltenyi Biotec     |
| 2DL1 (CD158a)       | APC-Vio770          | 130-103-970       | Miltenyi Biotec     |
| CD45                | VioBlue             | 130-098-136       | Miltenyi Biotec     |
| CD56                | PerCP-Vio700        | 130-100-679       | Miltenyi Biotec     |
| DNAM                | BB515               | 565152            | BD                  |
| CD57                | PE                  | 560844            | BD                  |
| NKp46               | PE-Cy7              | 562101            | BD                  |
| NKp30               | APC                 | 558408            | BD                  |
| CXCR3               | AF488               | 561730            | BD                  |
| CCR7                | PE                  | FAB197P           | RnD                 |
| CD45RO              | PE-Cy7              | 560608            | BD                  |
| CXCR4               | APC                 | 560936            | BD                  |

**Supplemental Table 1.** Antibodies used in immunophenotyping assay.
